# Supplementary material for: Long-Term Oral Administration of LLHK, LHK, and HK Alters Gene Expression Profile and Restores Age-Dependent Atrophy and Dysfunction of Rat Salivary Glands
Source: PubMed Central journal article supplement (PMC7168239; doi:10.3390/biomedicines8020038), 2020-02-20
Supplement: biomedicines-08-00038-s001.pdf [file biomedicines-08-00038-s001.pdf]

Table S1. Genes up-regulated by >2.0-fold ( $p < 0.05$ ) in SLGs from LHK-treated group compared to those from water-treated group.

| GeneName                                                        | GeneSymbol | FC    | Accession no | p-value |
|-----------------------------------------------------------------|------------|-------|--------------|---------|
| <b>Salivary gland homeostasis genes</b>                         |            |       |              |         |
| <b>Cytoplasm components</b>                                     |            |       |              |         |
| tubulin, beta 3 class III                                       | Tubb3      | 3.73  | NM_139254    | 0.040   |
| synapsin I                                                      | Syn1       | 2.22  | NM_019133    | 0.045   |
| tubulin, alpha 3A                                               | Tuba3a     | 2.19  | NM_001040008 | 0.046   |
| lipocalin 6                                                     | Lcn6       | 2.14  | NM_001001519 | 0.034   |
| <b>Other genes</b>                                              |            |       |              |         |
| RGD1559532                                                      | RGD1559532 | 75.76 | NM_001024983 | 0.034   |
| apelin receptor                                                 | Aplnr      | 67.78 | NM_031349    | 0.034   |
| BPI fold containing family B, 1                                 | Bpifb1     | 32.58 | NM_001077680 | 0.014   |
| BPI fold containing family A, 2                                 | Bpifa2     | 5.38  | NM_052808    | 0.026   |
| enamelin                                                        | Enam       | 4.63  | NM_001106001 | 0.048   |
| ELAV like RNA binding protein 4                                 | Elavl4     | 3.32  | NM_001077651 | 0.046   |
| fibroblast growth factor 4                                      | Fgf4       | 3.23  | NM_053809    | 0.014   |
| granzyme C                                                      | Gzmc       | 3.01  | NM_134332    | 0.031   |
| olfactory receptor 1519                                         | Olr1519    | 2.97  | NM_001000037 | 0.032   |
| interleukin 21                                                  | Il21       | 2.82  | NM_001108943 | 0.002   |
| granzyme A                                                      | Gzma       | 2.73  | NM_153468    | 0.041   |
| paraneoplastic Ma antigen family, 5                             | Pnma5      | 2.69  | NM_001107579 | 0.018   |
| thioesterase superfamily member 5                               | Them5      | 2.60  | NM_001108558 | 0.013   |
| sterile alpha motif domain containing 3                         | Samd3      | 2.58  | NM_001172116 | 0.003   |
| gigaxonin                                                       | Gan        | 2.49  | NM_001107434 | 0.026   |
| olfactory receptor 1598                                         | Olr1598    | 2.47  | NM_001000910 | 0.004   |
| transgelin 3                                                    | Tagln3     | 2.44  | NM_031676    | 0.005   |
| amine oxidase, copper containing 2                              | Aoc2-ps1   | 2.43  | NR_033180    | 0.046   |
| killer cell lectin-like receptor family I, 2                    | Klri2      | 2.37  | NM_001012648 | 0.011   |
| cytokine receptor-like factor 3                                 | Crlf3      | 2.37  | NM_001168612 | 0.034   |
| olfactory receptor 921                                          | Olr921     | 2.25  | NM_001001385 | 0.017   |
| ATPase H <sup>+</sup> /K <sup>+</sup> transporting beta subunit | Atp4b      | 2.24  | NM_012510    | 0.008   |
| V-set pre-B cell surrogate light chain 3                        | Vpreb3     | 2.24  | NM_001108930 | 0.042   |
| essential meiotic structure endonuclease 1                      | Eme1       | 2.22  | NM_001105830 | 0.018   |
| pyruvate kinase, muscle                                         | Pkm        | 2.19  | NM_053297    | 0.003   |
| major facilitator superfamily domain 6-like                     | Mfsd6l     | 2.18  | NM_001105787 | 0.049   |

|                                                                   |              |      |                        |       |
|-------------------------------------------------------------------|--------------|------|------------------------|-------|
| olfactory receptor 515                                            | Olr515       | 2.14 | NM_001000315           | 0.007 |
| Ly6/neurotoxin 1                                                  | Lynx1        | 2.14 | NM_001130546           | 0.043 |
| amelogenin, X-linked                                              | Amelx        | 2.13 | NM_001271074           | 0.001 |
| calsyntenin 2                                                     | Clstr2       | 2.12 | NM_134377              | 0.030 |
| translocase of inner mitochondrial 44                             | Timm44       | 2.09 | NM_017267              | 0.005 |
| sterile alpha and TIR motif containing 1                          | Sarm1        | 2.09 | NM_001105817           | 0.026 |
| nuclear factor of activated T-cells 2                             | Nfatc2       | 2.09 | XM_017591801           | 0.025 |
| myosin binding protein C, slow type                               | Mybpc1       | 2.08 | NM_001100758           | 0.002 |
| hes-related family bHLH transcription factor with YRPW motif-like | Hey1         | 2.04 | NM_001107977           | 0.029 |
| T cell activation inhibitor, mitochondrial                        | Tcaim        | 2.04 | NM_001110838           | 0.005 |
| histidine decarboxylase                                           | Hdc          | 2.00 | NM_017016              | 0.036 |
| <b>ENSRNOT genes</b>                                              |              |      |                        |       |
| family with sequence similarity 13, C                             | Fam13c       | 4.59 | ENSRNOT00000051491     | 80.04 |
| methyltransferase like 8                                          |              | 3.86 | ENSRNOT00000075860     | 0.020 |
| family with sequence similarity 160, B1                           | Fam160b1     | 2.38 | ENSRNOT00000023247     | 0.047 |
| similar to KIAA1549 protein                                       | RGD1306271   | 2.37 | ENSRNOT00000040391     | 0.049 |
| pappalysin 2                                                      | Pappa2       | 2.34 | ENSRNOT00000089332     | 0.030 |
| IgLON family member 5                                             | Iglon5       | 2.28 | ENSRNOT00000024150     | 0.026 |
| ubiquitin specific peptidase 27,                                  |              | 2.28 | ENSRNOT00000003800     | 0.020 |
| ly-6/neurotoxin-like protein 1-like                               |              | 2.26 | ENSRNOT00000073179     | 0.024 |
| solute carrier family 18 member B1                                | Slc18b1      | 2.24 | ENSRNOT00000021944     | 0.035 |
| RAD51 associated protein 2                                        |              | 2.14 | ENSRNOT00000075503     | 0.004 |
| nuclear receptor subfamily 1, group H, 5                          | Nr1h5        | 2.01 | ENSRNOT00000036229     | 0.009 |
| zinc finger protein 182-like                                      | LOC102555377 | 2.09 | ENSRNOT00000034746     | 0.047 |
| <b>Predicted genes</b>                                            |              |      |                        |       |
| uncharacterized                                                   | LOC102555043 | 2.96 | PREDICTED:XR_001840966 | 0.026 |
| uncharacterized                                                   | LOC102553665 | 2.96 | PREDICTED:XR_344513    | 0.024 |
| uncharacterized                                                   | LOC103692336 | 2.91 | PREDICTED:XR_001843643 | 0.024 |
| transcript variant X4                                             |              |      |                        |       |
| uncharacterized                                                   | LOC102556336 | 2.87 | PREDICTED:XR_597473    | 0.001 |
| similar to RIKEN cDNA 5031410I06,                                 | LOC679711    | 2.83 | PREDICTED:XM_017590496 | 0.041 |
| transcript variant X9                                             |              |      |                        |       |
| uncharacterized                                                   | LOC102554987 | 2.54 | PREDICTED:XR_590492    | 0.004 |
| cDNA clone urg1-00021-g10 5'                                      |              | 2.48 | AMGNNUC:CB793397       | 0.040 |
| uncharacterized, transcript variant X1                            | LOC103692702 | 2.48 | PREDICTED:XR_593187    | 0.036 |
| cDNA clone LIONp463H04130 3'                                      |              | 2.45 | CR475266               | 0.003 |

uncharacterized, transcript variant X1      LOC102549525      2.40      PREDICTED:XR\_592148      0.023

(n=3)

Table S2. Genes down-regulated by >2.0-fold ( $p < 0.05$ ) in SLGs from LHK-treated group compared to those from water-treated group.

| GeneName                                        | GeneSymbol | FC    | Accession no | p-value  |
|-------------------------------------------------|------------|-------|--------------|----------|
| <b>Salivary gland homeostasis protein genes</b> |            |       |              |          |
| <b>Membrane components</b>                      |            |       |              |          |
| glycoprotein 2                                  | Gp2        | -8.45 | NM_134418    | 0.003    |
| transmembrane protein 67                        | Tmem67     | -8.07 | NM_001107916 | 0.021    |
| solute carrier family 22, member 20             | Slc22a20   | -3.02 | NM_001106327 | 0.028    |
| protocadherin gamma subfamily A, 5              | Pcdhga5    | -2.69 | NM_001037137 | 0.025    |
| Eph receptor B2                                 | Ephb2      | -4.80 | NM_001127319 | 0.004    |
| chloride channel, voltage-sensitive 2           | Clcn2      | -2.59 | NM_017137    | 0.032    |
| calpain 3                                       | Capn3      | -2.63 | NM_017117    | 0.016    |
| oxidized low density lipoprotein receptor 1     | Olr1       | -2.49 | NM_133306    | 0.044    |
| glycoprotein IX (platelet)                      | Gp9        | -2.48 | NM_001031825 | 0.005    |
| transmembrane protein 170B                      | Tmem170b   | -2.08 | NM_001008774 | 0.007    |
| <b>Cytoplasm components</b>                     |            |       |              |          |
| zinc finger protein 13                          | Zfp13      | -5.82 | NM_001105765 | 0.018    |
| kelch repeat and BTB domain containing 4        | Kbtbd4     | -4.39 | NM_001107746 | 3.48E-04 |
| PICALM interacting mitotic regulator            | Pimreg     | -2.75 | NM_001113781 | 0.037    |
| profilin 3                                      | Pfn3       | -2.23 | NM_001109487 | 0.011    |
| keratin 24                                      | Krt24      | -2.58 | NM_001004131 | 0.017    |
| DnaJ heat shock protein family (Hsp40) B13      | Dnajb13    | -2.11 | NM_001005885 | 0.028    |
| family with sequence similarity 71, member B    | Fam71b     | -2.10 | NM_001025031 | 0.026    |
| FERM domain containing 3                        | Frmcd3     | -2.10 | NM_001106662 | 0.048    |
| <b>Immune response</b>                          |            |       |              |          |
| T-cell receptor beta chain                      | Tcrb       | -5.07 | CO560445     | 0.005    |
| defensin RatNP-3 precursor, mRNA sequence       | RatNP-3b   | -2.79 | BQ200749     | 0.018    |
| complement C9                                   | C9         | -2.36 | NM_057146    | 0.035    |
| autoimmune regulator                            | Aire       | -2.31 | NM_001106379 | 0.003    |
| tumor necrosis factor                           | Tnf        | -2.31 | NM_012675    | 0.012    |
| interleukin 1 beta                              | Il1b       | -2.09 | NM_031512    | 0.002    |
| <b>Other genes</b>                              |            |       |              |          |

|                                                      |            |       |               |          |
|------------------------------------------------------|------------|-------|---------------|----------|
| olfactory receptor 673                               | Olr673     | -9.36 | NM_001000351  | 0.049    |
| glutamate ionotropic receptor kainate type subunit 2 | Grik2      | -5.42 | NM_019309     | 0.013    |
| olfactory receptor 1525                              | Olr1525    | -5.24 | NM_001000529  | 3.99E-04 |
| potassium channel tetramerization domain 4           | Kctd4      | -4.15 | NM_001109650  | 0.010    |
| olfactory receptor 1122                              | Olr1122    | -3.95 | NM_001000882  | 0.005    |
| olfactory receptor 371                               | Olr371     | -3.76 | NM_001000258  | 0.048    |
| HORMA domain containing 1                            | Hormad1    | -3.26 | NM_001108949  | 0.009    |
| notochord homeobox                                   | Noto       | -3.17 | NM_001192014  | 0.022    |
| olfactory receptor 219                               | Olr219     | -2.98 | NM_001001372  | 0.041    |
| RT1 class I, M1, gene 5                              | RT1-M1-5   | -2.90 | NM_001168332  | 0.047    |
| meiotic double-stranded break formation protein 4    | Mei4       | -2.84 | NM_001109378  | 0.010    |
| MOS proto-oncogene, serine/threonine kinase          | Mos        | -2.83 | NM_020102     | 0.005    |
| olfactory receptor 1149                              | Olr1149    | -2.75 | NM_001000874  | 0.022    |
| similar to RIKEN cDNA 1700063I17                     | RGD1560958 | -2.66 | NM_001109157  | 0.021    |
| Myb/SANT DNA binding domain containing 1             | Msantd1    | -2.59 | NM_001109089  | 0.042    |
| crystallin, beta A1                                  | Cryba1     | -2.58 | NM_013056     | 0.007    |
| olfactory receptor gene Olr1686                      | Olr1686    | -2.53 | NM_001001373  | 0.035    |
| C-type lectin domain family 3, member A              | Clec3a     | -2.56 | NM_001108899  | 0.001    |
| tubby-like protein 2                                 | Tulp2      | -2.37 | NM_001012168  | 0.044    |
| angiopoietin 2                                       | Angpt2     | -2.35 | NM_134454     | 0.044    |
| complexin 4                                          | Cplx4      | -2.32 | NM_001191835] | 0.034    |
| sperm motility kinase 2A                             | Smok2a     | -2.28 | NM_001191619  | 0.047    |
| olfactory receptor 1687                              | Olr1687    | -2.27 | NM_001000508  | 0.027    |
| GIMAP family P-loop NTPase domain containing 1       | Gimd1      | -2.21 | NM_001113782  | 0.006    |
| olfactory receptor 60                                | Olr60      | -2.19 | NM_001000748  | 0.046    |
| dendrin                                              | Ddn        | -2.17 | NM_030993     | 0.041    |
| olfactory receptor 1699                              | Olr1699    | -2.15 | NM_001001112  | 0.040    |
| glutamate metabotropic receptor 2                    | Grm2       | -2.15 | NM_001105711  | 0.002    |
| immediate early response 3 interacting protein 1     | Ier3ip1    | -2.12 | NM_001047956  | 0.040    |
| tektin 3                                             | Tekt3      | -2.12 | NM_001024739  | 0.039    |
| neutrophil cytosolic factor 2                        | Ncf2       | -2.10 | NM_001100984  | 0.032    |
| Cd300 molecule-like family member F                  | Cd300lf    | -2.10 | NM_001025111  | 0.032    |
| contactin associated protein-like 5A                 | Cntnap5a   | -2.09 | NM_001047865  | 0.038    |
| ADAM metallopeptidase with thrombospondin type 1     | Adamts1    | -2.06 | TC573828      | 0.038    |
| hypothetical protein LOC689065                       | LOC689065  | -2.06 | NM_001109521  | 0.040    |
| similar to immunoglobulin heavy chain                |            | -2.04 | XM_345749     | 0.029    |

### ENSRNOT genes

|                                                                          |            |       |                        |          |
|--------------------------------------------------------------------------|------------|-------|------------------------|----------|
| MAP/microtubule affinity-regulating kinase like 1                        |            | -9.48 | ENSRNOT00000058760     | 0.047    |
| DAZ interacting protein 1, pseudogene 1                                  |            | -7.26 | ENSRNOT00000072327     | 0.040    |
| leucine rich repeat containing 30                                        | Lrrc30     | -5.24 | ENSRNOT00000049720     | 6.14E-04 |
| ryanodine receptor 1                                                     |            | -5.05 | ENSRNOT00000027893     | 0.031    |
| WBP2 N-terminal like                                                     | Wbp2nl     | -4.36 | ENSRNOT00000010606     | 0.044    |
| ATPase phospholipid transporting 8A1                                     | Atp8a1     | -4.03 | ENSRNOT00000044017     | 0.029    |
| Cd300 molecule-like family member D                                      |            | -3.58 | ENSRNOT00000077882     | 0.031    |
| early growth response 1                                                  | Egr1       | -2.86 | ENSRNOT00000026303     | 0.050    |
| unc-51 like kinase 4                                                     | Ulk4       | -2.73 | ENSRNOT00000074423     | 0.038    |
| transmembrane protease, serine 11e                                       |            | -2.69 | ENSRNOT00000036948     | 0.033    |
| LRRGT00141                                                               | LOC499235  | -2.69 | ENSRNOT00000045415     | 0.045    |
| signal-regulatory protein alpha-like                                     |            | -2.69 | ENSRNOT00000071638     | 0.007    |
| X-ray radiation resistance associated 1                                  | Xrra1      | -2.62 | ENSRNOT00000087818     | 0.021    |
| zinc finger and SCAN domain containing 4F                                | Zscan4f    | -2.53 | ENSRNOT00000030164     | 0.034    |
| trichohyalin                                                             | Tchh       | -2.52 | ENSRNOT00000090212     | 0.004    |
| neurologin 1                                                             | Nlgn1      | -2.51 | ENSRNOT00000092660     | 0.008    |
| SMG6 nonsense mediated mRNA decay factor                                 | Smg6       | -2.47 | ENSRNOT00000052412     | 0.027    |
| synaptonemal complex central element protein 1                           | Syce11     | -2.45 | ENSRNOT00000045250     | 0.038    |
| LRRGT00094                                                               |            | -2.40 | ENSRNOT00000072833     | 0.034    |
| disks large homolog 5-like                                               |            | -2.33 | ENSRNOT00000046644     | 0.006    |
| acyl-protein thioesterase 1 pseudogen                                    |            | -2.32 | ENSRNOT00000011092     | 0.048    |
| serine protease inhibitor, Kunitz type 4                                 |            | -2.25 | ENSRNOT00000019849     | 0.046    |
| protocadherin beta 7                                                     | Pcdhb7     | -2.23 | ENSRNOT00000073425     | 0.029    |
| ankyrin repeat domain 63                                                 | Ankrd63    | -2.22 | ENSRNOT00000056450     | 0.036    |
| immunoglobulin superfamily, member 9B                                    | Igsf9b     | -2.20 | ENSRNOT00000012391     | 0.005    |
| multiple EGF-like-domains 11                                             | Megf11     | -2.18 | ENSRNOT00000037941     | 0.043    |
| similar to KIAA0825 protein                                              | RGD1560883 | -2.15 | ENSRNOT00000071535     | 0.003    |
| keratin associated protein 3-1                                           | Krtap3-1   | -2.14 | ENSRNOT00000016752     | 9.019    |
| collagen type XI alpha 2 chain                                           | Col11a2    | -2.14 | ENSRNOT00000084117     | 0.041    |
| cilia and flagella associated protein 70                                 | Cfap70     | -2.13 | ENSRNOT00000035345     | 0.034    |
| serine (or cysteine) peptidase inhibitor, clade B (ovalbumin), member 3A | Serpib3a   | -2.08 | ENSRNOT00000003475     | 0.002    |
| family with sequence similarity 47, A                                    | Fam47a     | -2.06 | ENSRNOT00000005141     | 0.026    |
| transmembrane protein 253                                                | Tmem253    | -2.06 | ENSRNOT00000060521     | 0.044    |
| EF-hand calcium binding domain 5                                         | Efcab5     | -2.03 | PREDICTED:XM_006220732 | 0.036    |

|                                                             |              |        |                         |       |
|-------------------------------------------------------------|--------------|--------|-------------------------|-------|
| hypothetical protein LOC689042                              |              | -2.02  | ENSRNOT00000034929      | 0.017 |
| ATP binding cassette subfamily B member 5                   | Abcb5        | -2.02  | ENSRNOT00000074197      | 0.036 |
| <b>Predicted genes</b>                                      |              |        |                         |       |
| sperm motility kinase 3-like                                | LOC103695049 | -23.95 | PREDICTED:XM_008774726  | 0.047 |
| filaggrin family member 2                                   | Flg2         | -13.91 | PREDICTED:XM_017596329  | 0.045 |
| EF hand calcium binding domain 1                            | Efcab1       | -6.42  | PREDICTED:XM_017597950  | 0.019 |
| olfactory receptor 143-like                                 | LOC102554388 | -6.23  | PREDICTED:XM_008766089  | 0.044 |
| similar to ankyrin repeat domain 26                         | LOC691693    | -5.55  | PREDICTED:XM_001079298  | 0.042 |
| retinitis pigmentosa GTPase regulator interacting protein 1 | Rpgrip1      | -4.33  | PREDICTED:XM_017599867  | 0.029 |
| probable ATP-dependent RNA helicase DDX60-like              | LOC100911190 | -3.89  | PREDICTED:XM_017600408  | 0.003 |
| collagen alpha-1(XXIII) chain                               | LOC103693323 | -3.84  | PREDICTED:XM_017597627  | 0.031 |
| disks large homolog 5-like                                  | LOC102554774 | -3.75  | PREDICTED:XM_006251741  | 0.023 |
| zinc finger protein 2 homolog                               | LOC108348729 | -3.55  | PREDICTED:XM_017587800  | 0.042 |
| myosin heavy chain 13                                       | Myh13        | -3.54  | PREDICTED:XM_008775759  | 0.046 |
| regulatory factor X4                                        | Rfx4         | -3.44  | PREDICTED:XM_006241183  | 0.039 |
| heparan sulfate 6-O-sulfotransferase 2                      | Hs6st2       | -3.31  | PREDICTED:XM_017601970  | 0.010 |
| coiled-coil domain containing 71-like                       | Ccdc711      | -3.14  | PREDICTED:XM_003750141  | 0.014 |
| zinc finger protein 945                                     | Zfp945       | -3.13  | PREDICTED:XM_006228099  | 0.024 |
| centromere protein O                                        | Cenpo        | -3.05  | PREDICTED:XM_008764544  | 0.035 |
| BTB domain containing 7                                     | Btbd7        | -2.95  | PREDICTED:XM_008764820  | 0.038 |
| NOP2/Sun RNA methyltransferase family member 7              | Nsun7        | -2.80  | PREDICTED:XM_006250947  | 0.045 |
| period circadian clock 1                                    | Per1         | -2.70  | PREDICTED:XM_006246614  | 0.007 |
| rCG23154-like                                               | LOC680725    | -2.67  | PREDICTED:XR_146481     | 0.010 |
| cytochrome P450, family 2, subfamily r, polypeptide 1       | Cyp2r1       | -2.64  | PREDICTED:XM_008759769  | 0.039 |
| E4F transcription factor 1                                  | E4f1         | -2.60  | PREDICTED:XM_006246026  | 0.007 |
| signal-regulatory protein alpha-like                        | LOC100365868 | -2.59  | PREDICTED:XM_008758154  | 0.002 |
| BRCA2-interacting protein-like                              | LOC100360296 | -2.59  | PREDICTED:XM_003754681  | 0.050 |
| similar to Discs, large homolog 5                           | RGD1563738   | -2.55  | PREDICTED:XM_008766093  | 0.039 |
| exocyst complex component 2-like                            | LOC103689971 | -2.51  | PREDICTED:XM_006253876  | 0.027 |
| rCG25329-like                                               | LOC100360613 | -2.44  | PREDICTED:XR_001839588  | 0.049 |
| transmembrane protein 132C                                  | Tmem132c     | -2.39  | PREDICTED:XM_002724836  | 0.023 |
| similar to RIKEN cDNA 9430015G10                            | RGD1311517   | -2.34  | PREDICTED:XM_008764363  | 0.002 |
| proline-rich extensin-like protein                          | LOC103692530 | -2.32  | PREDICTED:XM_008776184  | 0.021 |
| G protein-coupled receptor 152                              | Gpr152       | -2.30  | PREDICTED:XM_001068698  | 0.031 |
| contactin associated protein-like 2                         | Cntnap2      | -2.28  | PREDICTED:XM_008762930  | 0.029 |
| calcium binding and coiled-coil domain 2                    | Calcoco2     | -2.25  | PREDICTED:XM_008768252] | 0.040 |

|                                                                    |              |       |                        |       |
|--------------------------------------------------------------------|--------------|-------|------------------------|-------|
| transient receptor potential cation channel, subfamily M, member 6 | Trpm6        | -2.24 | PREDICTED:XM_006223673 | 0.005 |
| similar to Spindlin-like protein 2                                 | LOC367746    | -2.23 | PREDICTED:XM_008758379 | 0.016 |
| partitioning defective 6 homolog gamma-like                        | LOC100909590 | -2.20 | PREDICTED:XM_003751813 | 0.040 |
| autophagy related 10                                               | Atg10        | -2.19 | PREDICTED:XM_006231757 | 0.037 |
| similar to glyceraldehyde-3-phosphate dehydrogenase                | RGD1560797   | -2.16 | PREDICTED:XR_340823    | 0.020 |
| katanin p60 ATPase-containing subunit A-like 1-like                | LOC100910196 | -2.15 | PREDICTED:XM_006248828 | 0.021 |
| PX domain containing serine/threonine kinase                       | Pxk          | -2.14 | PREDICTED:XM_017599724 | 0.007 |
| transmembrane protein 92-like                                      | LOC103693451 | -2.09 | PREDICTED:XM_008768247 | 0.046 |
| elastin microfibril interfacier 3                                  | Emilin3      | -2.07 | PREDICTED:XM_006235495 | 0.044 |
| H2A histone family, member Y                                       | H2afy        | -2.06 | PREDICTED:XM_006253577 | 0.049 |
| PCF11 cleavage and polyadenylation factor subunit                  | Pcf11        | -2.06 | PREDICTED:XM_008774627 | 0.043 |
| glycine decarboxylase                                              | Gldc         | -2.05 | PREDICTED:XM_006231210 | 0.030 |
| proline rich 23 domain containing 2                                | Prr23d2      | -2.05 | PREDICTED:XM_008766601 | 0.003 |
| ADMA metalloproteinase with thrombospondin 1 motif, 6              | Adamts6      | -2.01 | PREDICTED:XM_017593685 | 0.027 |
| carboxypeptidase O                                                 | Cpo          | -2.01 | PREDICTED:XM_017596898 | 0.026 |

(n=3)
